# Supplementary material
Source: Springer Nature journal article supplement (https://www.springermedizin.de/resource/supplementary/12985_2010_828_MOESM3_ESM.pdf/9609280)

1

M

2

4500bp

3000bp

2000bp

1200bp

800bp

500bp

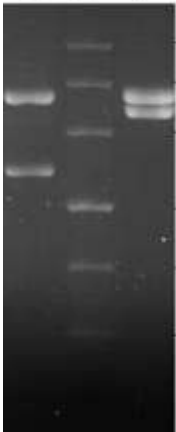

Supplement: MOESM3 [file 9609280]
